# Supplementary material
Source: ML conference proceedings conference paper supplement (https://proceedings.neurips.cc/paper_files/paper/2017/hash/2612aa892d962d6f8056b195ca6e550d-Abstract.html)
Supplement: Supplementary file [file 2612aa892d962d6f8056b195ca6e550d-Supplemental.zip]

---

# Supplementary Material for "Adaptive Accelerated Gradient Converging Method under Hölderian Error Bound Condition"

---

Mingrui Liu, Tianbao Yang  
Department of Computer Science  
The University of Iowa, Iowa City, IA 52242  
mingrui-liu, tianbao-yang@uiowa.edu

We first present the two options of PG.

---

---

**Algorithm:** PG

**Input:**  $\mathbf{x}_1 \in \Omega$

**for**  $\tau = 1, \dots, t$  **do**

$\mathbf{x}_{\tau+1} = P_{g/L}(\mathbf{x}_\tau - \nabla f(\mathbf{x}_\tau)/L)$

Option I: return  $\mathbf{x}_{t+1}$

Option II: return  $\mathbf{x}_k$  s.t.  $G(\mathbf{x}_k) = \min_\tau \|G(\mathbf{x}_\tau)\|_2$

---

## 1 Definitions

We introduce two definitions that are mentioned in section 2: semi-algebraic set and semi-algebraic function [2].

**Definition 2.** A subset  $S \subset \mathbb{R}^d$  is called a real semi-algebraic set if there exist a finite number of real polynomial functions  $g_{ij}, h_{ij} : \mathbb{R}^d \rightarrow \mathbb{R}$  such that

$$S = \cup_{j=1}^p \cap_{i=1}^q \{\mathbf{u} \in \mathbb{R}^d; g_{ij}(\mathbf{u}) = 0 \text{ and } h_{ij}(\mathbf{u}) \leq 0\}.$$

**Definition 3.** A function  $F(\mathbf{x})$  is called a semi-algebraic function if its graph  $\{(\mathbf{u}, s) \in \mathbb{R}^{d+1} : F(\mathbf{u}) = s\}$  is a semi-algebraic set.

## 2 Propositions

We introduce some results that are useful for our further analysis.

**Proposition 5.** [7] Assume  $f(\mathbf{x})$  is  $L$ -smooth and  $g(\mathbf{x})$  is  $\alpha$ -strongly convex. Let ADG (Algorithm 1) run for  $t = 0, \dots, T$  iterations. Then for any  $\mathbf{x}$  we have

$$F(\mathbf{x}_{T+1}) - F(\mathbf{x}) \leq \frac{L}{2} \|\mathbf{x}_0 - \mathbf{x}\|_2^2 \left( \frac{1}{1 + \sqrt{\alpha/2L}} \right)^{2T}.$$

**Proposition 6.** [1, Lemma 2.3] Let  $F(\mathbf{x}) = f(\mathbf{x}) + g(\mathbf{x})$ . Assume  $f(\mathbf{x})$  is  $L$ -smooth. For any  $\mathbf{x}, \mathbf{y}$  and  $\eta \leq 1/L$ , we have

$$F(\mathbf{y}_\eta^+) \leq F(\mathbf{x}) + G_\eta(\mathbf{y})^\top (\mathbf{y} - \mathbf{x}) - \frac{\eta}{2} \|G_\eta(\mathbf{y})\|_2^2.$$

**Proposition 7.** [1, Theorem 3.1] Consider PG with option I, whose update formula is

$$\mathbf{x}_{t+1} = P_{\eta g}(\mathbf{x}_t - \eta \nabla f(\mathbf{x}_t)). \quad (11)$$

Let (11) run for  $t = 1, \dots, T$  iterations with  $\eta \leq 1/L$ , we have

$$F(\mathbf{x}_{T+1}) - F_* \leq \frac{D(\mathbf{x}_1, \Omega_*)^2}{2\eta T}.$$

**Proposition 8.** [8] Consider one specific variant of APG, whose update formula is

$$\begin{cases} \mathbf{y}_t = \mathbf{x}_t + \beta_t(\mathbf{x}_t - \mathbf{x}_{t-1}), \\ \mathbf{x}_{t+1} = P_{\eta g}(\mathbf{y}_t - \eta \nabla f(\mathbf{y}_t)), \end{cases} \quad (12)$$

where  $\eta \leq 1/L$  and  $\beta_t = \frac{t-1}{t+2}$ . Let (12) run for  $t = 1, \dots, T$  iterations with  $\eta \leq 1/L$  and  $\mathbf{x}_0 = \mathbf{x}_1$ , we have

$$F(\mathbf{x}_{T+1}) - F_* \leq \frac{2D(\mathbf{x}_1, \Omega_*)^2}{\eta(T+1)^2}.$$

**Proposition 9.** [5, Theorem 1] Assume  $f(\mathbf{x})$  is  $L$ -smooth and  $\alpha$ -strongly convex. Let (12) run for  $t = 1, \dots, T$  with  $\eta = 1/L$ ,  $\beta_t = \frac{\sqrt{L}-\sqrt{\alpha}}{\sqrt{L}+\sqrt{\alpha}}$  and  $\mathbf{x}_0 = \mathbf{x}_1$ , we have for any  $\mathbf{x}$

$$F(\mathbf{x}_{T+1}) - F(\mathbf{x}) \leq \left(1 - \sqrt{\frac{\alpha}{L}}\right)^T \left[ F(\mathbf{x}_0) - F(\mathbf{x}) + \frac{\alpha}{2} \|\mathbf{x}_0 - \mathbf{x}\|_2^2 \right].$$

**Proposition 10.** [3, Theorem 5 in v3] Let  $f : H \rightarrow (-\infty, +\infty]$  be a proper, convex and lower semi-continuous with  $\min f = f_*$ . Let  $r_0 > 0$ ,  $\varphi \in \{ \varphi \in C^0[0, r_0) \cap C^1(0, r_0), \varphi(0) = 0, \varphi \text{ is concave}, \varphi > 0 \}$ ,  $c > 0, \rho > 0$ , and  $\bar{x} \in \arg \min f$ . If  $s\varphi'(s) \geq c\varphi(s)$  for all  $s \in (0, r_0)$ , and  $\varphi(f(x) - f_*) \geq D(x, \arg \min f)$  for all  $x \in [0 < f < r_0] \cap B(\bar{x}, \rho)$ , then  $\varphi'(f(x) - f_*) \|\partial f(x)\|_2 \geq c$  for all  $x \in [0 < f < r_0] \cap B(\bar{x}, \rho)$ .

The following proposition is a rephrase of Theorem 3.5 in [4].

**Proposition 11.** If  $f$  is  $L$ -smooth and convex,  $g$  is proper, convex and lower semi-continuous,  $F(\mathbf{x}) = f(\mathbf{x}) + g(\mathbf{x})$ ,  $\eta > 0$ , and define

$$P_{\eta F}(\mathbf{x}) = \arg \min_{\mathbf{u}} \frac{1}{2} \|\mathbf{u} - \mathbf{x}\|_2^2 + \eta F(\mathbf{u}).$$

Then the following inequality holds:

$$\left\| \frac{1}{\eta} (\mathbf{x} - P_{\eta F}(\mathbf{x})) \right\|_2 \leq (1 + L\eta) \|G_{\eta}(\mathbf{x})\|_2.$$

### 3 Lemmas and Corollaries

**Lemma 2.** If  $f(\mathbf{x})$  satisfies the HEB on  $\mathbf{x} \in \mathcal{S}_{\xi}$  with  $\theta \in (0, 1]$ , i.e., there exists  $c > 0$  such that for any  $\mathbf{x} \in \mathcal{S}_{\xi}$ , we have

$$D(\mathbf{x}, \Omega_*) \leq c(f(\mathbf{x}) - f_*)^{\theta}.$$

If  $\theta \in (0, 1)$ , then for any  $\mathbf{x} \in \mathcal{S}_{\xi}$ ,

$$D(\mathbf{x}, \Omega_*) \leq c^{\frac{1}{1-\theta}} \|\partial f(\mathbf{x})\|_2^{\frac{\theta}{1-\theta}}.$$

If  $\theta = 1$ , then for any  $\mathbf{x} \in \mathcal{S}_{\xi}$ ,

$$D(\mathbf{x}, \Omega_*) \leq c^2 \xi \|\partial f(\mathbf{x})\|_2.$$

*Proof.* The conclusion is trivial if  $\mathbf{x} \in \Omega_*$ . Otherwise, the proof follows Proposition 10. In particular, if we define  $\varphi(s) = cs^{\theta}$ , then  $D(\mathbf{x}, \Omega_*) \leq \varphi(f(\mathbf{x}) - f_*)$  for any  $\mathbf{x} \in \{\mathbf{x} : 0 < f(\mathbf{x}) - f_* \leq \xi\}$  and  $\varphi$  satisfies  $s\varphi'(s) \geq \theta\varphi(s)$ . By Proposition 10, we have

$$\varphi'(f(\mathbf{x}) - f_*) \|\partial f(\mathbf{x})\|_2 \geq \theta,$$

i.e.,

$$c \|\partial f(\mathbf{x})\|_2 \geq (f(\mathbf{x}) - f_*)^{1-\theta}. \quad (13)$$

When  $\theta = 1$ , we have  $\|\partial f(\mathbf{x})\|_2 \geq 1/c$  for  $\mathbf{x} \notin \Omega_*$ . As a result, when  $\theta \in (0, 1)$ ,

$$D(\mathbf{x}, \Omega_*) \leq c(f(\mathbf{x}) - f_*)^\theta \leq c^{\frac{1}{1-\theta}} \|\partial f(\mathbf{x})\|_2^{\frac{\theta}{1-\theta}}.$$

and when  $\theta = 1$ ,

$$D(\mathbf{x}, \Omega_*) \leq c(f(\mathbf{x}) - f_*) \leq c^2 \xi \|\partial f(\mathbf{x})\|_2.$$

□

**Corollary 2.** Let  $F(\mathbf{x}) = f(\mathbf{x}) + g(\mathbf{x})$ . Assume  $f(\mathbf{x})$  is  $L$ -smooth. For any  $\mathbf{x}, \mathbf{y}$  and  $0 < \eta \leq 1/L$ , we have

$$\frac{\eta}{2} \|G_\eta(\mathbf{y})\|_2^2 \leq F(\mathbf{y}) - F(\mathbf{y}_\eta^+) \leq F(\mathbf{y}) - \min_{\mathbf{x}} F(\mathbf{x}). \quad (14)$$

*Proof.* The proof is immediate by employing the convexity of  $F$  and Proposition 6. □

**Lemma 3.** By running the ADG (Algorithm 1) for minimizing  $F_\delta(\mathbf{x}) = f(\mathbf{x}) + g_\delta(\mathbf{x})$  with an initial solution  $\mathbf{x}_0$ , where  $g_\delta(\mathbf{x}) = g(\mathbf{x}) + \frac{\delta}{2} \|\mathbf{x} - \mathbf{x}_0\|_2^2$ , then for any  $\mathbf{x} \in \mathbb{R}^d$  and  $t \geq 0$ ,

$$F_\delta(\mathbf{x}_{t+1}) - F_\delta(\mathbf{x}) \leq \frac{L}{2} \|\mathbf{x}_0 - \mathbf{x}\|_2^2 \left[ 1 + \sqrt{\frac{\delta}{2L}} \right]^{-2t},$$

and  $F(\mathbf{x}_{t+1}) \leq F(\mathbf{x}_0)$ . If  $t \geq \sqrt{\frac{L}{2\delta}} \log\left(\frac{L}{\delta}\right)$ , we have  $\|\mathbf{x}_{t+1} - \mathbf{x}_0\|_2 \leq \sqrt{2} \|\mathbf{x}_0 - \mathbf{x}_*\|_2$ .

*Proof.* Applying Proposition 5 to  $F_\delta(\mathbf{x})$  yields

$$F(\mathbf{x}_{t+1}) - F(\mathbf{x}) + \frac{\delta}{2} \|\mathbf{x}_{t+1} - \mathbf{x}_0\|_2^2 \leq \frac{\delta}{2} \|\mathbf{x} - \mathbf{x}_0\|_2^2 + \frac{L}{2} \|\mathbf{x}_0 - \mathbf{x}\|_2^2 \left[ 1 + \sqrt{\frac{\delta}{2L}} \right]^{-2t}. \quad (15)$$

Then  $F(\mathbf{x}_{t+1}) - F(\mathbf{x}_0) \leq 0$ , and choose  $\mathbf{x} = \mathbf{x}_*$  in the inequality (15), where  $\mathbf{x}_* \in \Omega_*$ , then we have

$$\|\mathbf{x}_{t+1} - \mathbf{x}_0\|_2^2 \leq \|\mathbf{x}_0 - \mathbf{x}_*\|_2^2 + \frac{L}{\delta} \|\mathbf{x}_0 - \mathbf{x}_*\|_2^2 \left[ 1 + \sqrt{\frac{\delta}{2L}} \right]^{-2t}.$$

Under the condition  $t \geq \sqrt{\frac{L}{2\delta}} \log\left(\frac{L}{\delta}\right)$  we have  $\|\mathbf{x}_{t+1} - \mathbf{x}_0\|_2 \leq \sqrt{2} \|\mathbf{x}_0 - \mathbf{x}_*\|_2$ . □

**Lemma 4 (Perturbation of a Strongly Convex Problem).** Let  $h(\mathbf{x})$  be a  $\sigma$ -strongly convex function,  $\mathbf{x}_a^*$  and  $\mathbf{x}_b^*$  be the optimal solutions to the following problems.

$$\mathbf{x}_a^* = \min_{\mathbf{x} \in \mathbb{R}^d} \mathbf{a}^\top \mathbf{x} + h(\mathbf{x}).$$

$$\mathbf{x}_b^* = \min_{\mathbf{x} \in \mathbb{R}^d} \mathbf{b}^\top \mathbf{x} + h(\mathbf{x}).$$

Then

$$\|\mathbf{x}_a^* - \mathbf{x}_b^*\|_2 \leq \frac{2\|\mathbf{a} - \mathbf{b}\|_2}{\sigma}.$$

*Proof.* Let  $H_a(\mathbf{x}) = h(\mathbf{x}) + \mathbf{a}^\top \mathbf{x}$  and  $H_b(\mathbf{x}) = h(\mathbf{x}) + \mathbf{b}^\top \mathbf{x}$ . By the strong convexity of  $h(\mathbf{x})$ , we have

$$\begin{aligned} \frac{\sigma}{2} \|\mathbf{x}_a^* - \mathbf{x}_b^*\|_2^2 &\leq H_a(\mathbf{x}_b^*) - H_a(\mathbf{x}_a^*) = H_b(\mathbf{x}_b^*) + (\mathbf{a} - \mathbf{b})^\top \mathbf{x}_b^* - H_b(\mathbf{x}_a^*) - (\mathbf{a} - \mathbf{b})^\top \mathbf{x}_a^* \\ &\leq (\mathbf{a} - \mathbf{b})^\top (\mathbf{x}_b^* - \mathbf{x}_a^*) \leq \|\mathbf{x}_a^* - \mathbf{x}_b^*\|_2 \|\mathbf{a} - \mathbf{b}\|_2, \end{aligned}$$

where we use the fact  $H_b(\mathbf{x}_b^*) \leq H_b(\mathbf{x}_a^*)$ . From the above inequality, we can get  $\|\mathbf{x}_a^* - \mathbf{x}_b^*\|_2 \leq \frac{2\|\mathbf{a} - \mathbf{b}\|_2}{\sigma}$ . □

## 4 Proofs

### A Proof of Theorem 1

*Proof.* Divide the whole FOR loop of PG into  $K$  stages, denote  $t_k$  by the number of iterations in the  $k$ -th stage, and denote  $\mathbf{x}_k$  by the updated  $\mathbf{x}$  at the end of the  $k$ -th stage, where  $k = 1, \dots, K$ . Define  $\epsilon_k := \frac{\epsilon_0}{2^k}$ .

Choose  $t_k = \lceil c^2 L \epsilon_{k-1}^{2\theta-1} \rceil$ , and we will prove  $F(\mathbf{x}_k) - F_* \leq \epsilon_k$  by induction. Suppose  $F(\mathbf{x}_{k-1}) - F_* \leq \epsilon_{k-1}$ , we have  $\mathbf{x}_{k-1} \in \mathcal{S}_{\epsilon_0}$ . According to Proposition 7, at the  $k$ -th stage, we have

$$F(\mathbf{x}_k) - F_* \leq \frac{L \|\mathbf{x}_{k-1} - \mathbf{x}_{k-1}^*\|_2^2}{2t_k},$$

where  $\mathbf{x}_{k-1}^* \in \Omega_*$ , the closest point to  $\mathbf{x}_{k-1}$  in the optimal set. By the HEB condition, we have

$$F(\mathbf{x}_k) - F_* \leq \frac{c^2 L \epsilon_{k-1}^{2\theta}}{2t_k}.$$

Since  $t_k \geq c^2 L \epsilon_{k-1}^{2\theta-1}$ , we have  $F(\mathbf{x}_k) - F_* \leq \epsilon_k$ . The total number of iterations is

$$\sum_{k=1}^K t_k \leq O(c^2 L \sum_{k=1}^K \epsilon_{k-1}^{2\theta-1}).$$

From the above analysis, we see that after each stage, the optimality gap decreases by half, so taking  $K = \lceil \log_2 \frac{\epsilon_0}{\epsilon} \rceil$  guarantees  $F(\mathbf{x}_K) - F_* \leq \epsilon$ .

If  $\theta > 1/2$ , the iteration complexity is  $O(c^2 L \epsilon_0^{2\theta-1})$ . To see this, if we plug in the definition of  $\epsilon_k$  into the total number of iterations, and we can get  $O(c^2 L \epsilon_0^{2\theta-1} \sum_{k=1}^K \frac{1}{2^{(2\theta-1)(k-1)}}) = O(c^2 L \epsilon_0^{2\theta-1})$ . If  $\theta = 1/2$ , the iteration complexity is  $O(c^2 L \log \frac{\epsilon_0}{\epsilon})$ . If  $\theta < 1/2$ , the iteration complexity is

$$\sum_{k=1}^K t_k \leq O(c^2 L \sum_{k=1}^K (\frac{\epsilon_0}{2^{k-1}})^{2\theta-1}) = O(c^2 L / \epsilon^{1-2\theta}).$$

□

### B Proof of Theorem 2

*Proof.* Similar to the proof of Theorem 1, we will prove by induction that  $F(\mathbf{x}_k) - F_* \leq \epsilon_k \triangleq \frac{\epsilon_0}{2^k}$ . Assume that  $F(\mathbf{x}_{k-1}) - F_* \leq \epsilon_{k-1}$ . Hence,  $\mathbf{x}_{k-1} \in \mathcal{S}_{\epsilon_0}$ . Then according to Proposition 8 and the HEB condition, we have

$$F(\mathbf{x}_k) - F_* \leq \frac{2c^2 L \epsilon_{k-1}^{2\theta}}{(t_k + 1)^2}.$$

Since  $t_k \geq 2c\sqrt{L} \epsilon_{k-1}^{\theta-1/2}$ , we have

$$F(\mathbf{x}_k) - F_* \leq \frac{\epsilon_{k-1}}{2} = \epsilon_k.$$

After  $K$  stages, we have  $F(\mathbf{x}_K) - F_* \leq \epsilon$ . The total number of iterations is

$$T_K = \sum_{k=1}^K t_k \leq O(c\sqrt{L} \epsilon_0^{\theta-1/2}).$$

When  $\theta > 1/2$ , we have  $T_K \leq O(c\sqrt{L} \epsilon_0^{\theta-1/2})$ . When  $\theta \leq 1/2$ , we have

$$T_K \leq O\left(\max\{c\sqrt{L} \log(\epsilon_0/\epsilon), c\sqrt{L}/\epsilon^{1/2-\theta}\}\right).$$

□

### C Proof of Theorem 3

*Proof.* By the update of PG with option II and Corollary 2, we have

$$F(\mathbf{x}_\tau) - F(\mathbf{x}_{\tau+1}) \geq \frac{1}{2L} \|G(\mathbf{x}_\tau)\|_2^2.$$

Let  $t = 2j$ . Summing over  $\tau = j, \dots, t$  gives

$$F(\mathbf{x}_j) - F(\mathbf{x}_{t+1}) \geq \frac{1}{2L} \sum_{\tau=j}^t \|G(\mathbf{x}_\tau)\|_2^2.$$

Since  $\|G(\mathbf{x}_\tau)\|_2 \geq \min_{1 \leq \tau \leq t} \|G(\mathbf{x}_\tau)\|_2$  and  $F(\mathbf{x}_{t+1}) \geq F_*$ , then we have

$$\frac{j}{2L} \min_{1 \leq \tau \leq t} \|G(\mathbf{x}_\tau)\|_2^2 \leq F(\mathbf{x}_j) - F_*.$$

Hence,

$$\min_{1 \leq \tau \leq t} \|G(\mathbf{x}_\tau)\|_2^2 \leq \frac{2L}{j} (F(\mathbf{x}_j) - F_*). \quad (16)$$

We consider three scenarios of  $\theta$ .

(I). If  $\theta > 1/2$ , according to Theorem 1, we know that  $F(\mathbf{x}_j) - F_*$  converges to 0 in  $j = O(c^2 L \epsilon_0^{2\theta-1})$  steps, so  $\min_{1 \leq \tau \leq t} \|G(\mathbf{x}_\tau)\|_2^2$  converges to 0 in  $t = O(c^2 L \epsilon_0^{2\theta-1})$  steps.

(II). If  $\theta = 1/2$ , let  $j = \max(k, 2L)$  and  $t = 2j$ , where  $k = ac^2 L \log(\frac{\epsilon_0}{\epsilon})$ , and  $a$  is a constant hided in the big O notation. According to Theorem 1, we have

$$F(\mathbf{x}_k) - F_* \leq \epsilon^2, \quad (17)$$

then the inequality (16), (17) and the choice of  $j, k$  yield

$$\min_{1 \leq \tau \leq t} \|G(\mathbf{x}_\tau)\|_2^2 \leq \frac{2L}{j} (F(\mathbf{x}_j) - F_*) \leq \epsilon^2,$$

so we know that  $t = O(c^2 L \log(\frac{\epsilon_0}{\epsilon}))$ .

(III). If  $\theta < 1/2$ , let  $j$  be an index such that  $F(\mathbf{x}_j) - F_* \leq \epsilon'$ . We can set  $j = 2ac^2 L / \epsilon'^{1-2\theta}$  and thus  $t = 4ac^2 L / \epsilon'^{1-2\theta}$ , and then we have

$$\min_{1 \leq \tau \leq t} \|G(\mathbf{x}_\tau)\|_2^2 \leq \frac{2L}{j} (F(\mathbf{x}_j) - F_*) \leq \frac{\epsilon' \epsilon'^{1-2\theta}}{ac^2} = \frac{\epsilon'^{2-2\theta}}{ac^2}.$$

Let  $\epsilon' = c^{\frac{1}{1-\theta}} \epsilon^{\frac{1}{(1-\theta)}}$ , we have  $\min_{1 \leq \tau \leq t} \|G(\mathbf{x}_\tau)\|_2^2 \leq \epsilon^2 / a$ . We can conclude  $t = O(c^{\frac{1}{1-\theta}} L / \epsilon^{\frac{1-2\theta}{1-\theta}})$ .

By combining the three scenarios, we can complete the proof.  $\square$

### D Proof of Lemma 1

*Proof.* The conclusion is trivial when  $\mathbf{x} \in \Omega_*$ , so we only need to consider the case when  $\mathbf{x} \notin \Omega_*$ . Define  $P_{\eta F}(\mathbf{x}) = \arg \min_{\mathbf{u}} \frac{1}{2} \|\mathbf{u} - \mathbf{x}\|_2^2 + \eta F(\mathbf{u})$ .

We first prove for  $\theta \in (0, 1/2]$ . It is not difficult to see that  $\frac{1}{\eta}(\mathbf{x} - P_{\eta F}(\mathbf{x})) \in \partial F(P_{\eta F}(\mathbf{x}))$ .

$$\begin{aligned} D(\mathbf{x}, \Omega_*) &\leq \|\mathbf{x} - P_{\eta F}(\mathbf{x})\|_2 + D(P_{\eta F}(\mathbf{x}), \Omega_*) \\ &\leq \|\mathbf{x} - P_{\eta F}(\mathbf{x})\|_2 + c^{\frac{1}{1-\theta}} \|\partial F(P_{\eta F}(\mathbf{x}))\|_2^{\frac{\theta}{1-\theta}} \\ &\leq \|\mathbf{x} - P_{\eta F}(\mathbf{x})\|_2 + \frac{c^{\frac{1}{1-\theta}}}{\eta^{\frac{\theta}{1-\theta}}} \|\mathbf{x} - P_{\eta F}(\mathbf{x})\|_2^{\frac{\theta}{1-\theta}} \\ &\leq \eta(1 + L\eta) \|G_\eta(\mathbf{x})\|_2 + c^{\frac{1}{1-\theta}} (1 + \eta L)^{\frac{\theta}{1-\theta}} \|G_\eta(\mathbf{x})\|_2^{\frac{\theta}{1-\theta}}, \end{aligned}$$

where the second inequality uses the result in Lemma 2 and the last inequality follows Proposition 11, which asserts that  $\|\mathbf{x} - P_{\eta F}(\mathbf{x})\|_2 \leq \eta(1 + L\eta)\|G_\eta(\mathbf{x})\|_2$ . Plugging the value  $\eta = 1/L$ , we have the result.

Next, we prove for  $\theta \in (1/2, 1]$ . For any  $\mathbf{x} \in S_\xi$ , we have  $P_{\eta F}(\mathbf{x}) \in S_\xi$  and

$$\begin{aligned} D(P_{\eta F}(\mathbf{x}), \Omega_*) &\leq c(F(P_{\eta F}(\mathbf{x})) - F_*)^\theta \\ &= c(F(P_{\eta F}(\mathbf{x})) - F_*)^{1-\theta}(F(P_{\eta F}(\mathbf{x})) - F_*)^{2\theta-1} \\ &\leq c^2 \|\partial F(P_{\eta F}(\mathbf{x}))\|_2 (F(\mathbf{x}) - F_*)^{2\theta-1} \\ &\leq c^2 \|\partial F(P_{\eta F}(\mathbf{x}))\|_2 \xi^{2\theta-1} \\ &\leq c^2 (1 + L\eta) \|G_\eta(\mathbf{x})\|_2 \xi^{2\theta-1} \\ &\leq 2c^2 \xi^{2\theta-1} \|G_\eta(\mathbf{x})\|_2, \end{aligned}$$

where the second inequality holds because the inequality (13) holds for any  $\theta \in (0, 1]$  (by Lemma 2),  $F(P_{\eta F}(\mathbf{x})) \leq F(\mathbf{x}) \leq \xi$ , the fourth inequality holds since  $\|G_\eta(\mathbf{x})\|_2 \geq \frac{1}{1+L\eta} \|(\mathbf{x} - P_{\eta F}(\mathbf{x}))/\eta\|_2 \geq \frac{1}{1+L\eta} \|\partial F(P_{\eta F}(\mathbf{x}))\|_2$  (by Proposition 11), and the last inequality holds by taking  $\eta = 1/L$ .

So for  $\theta \in (1/2, 1]$  and  $\eta = 1/L$ , we have

$$\begin{aligned} D(\mathbf{x}, \Omega_*) &\leq \|\mathbf{x} - P_{\eta F}(\mathbf{x})\|_2 + D(P_{\eta F}(\mathbf{x}), \Omega_*) \\ &\leq \left(\frac{2}{L} + 2c^2 \xi^{2\theta-1}\right) \|G(\mathbf{x})\|_2. \end{aligned}$$

□

## E Proof of Theorem 5

*Proof.* Let  $\mathbf{x}_\delta^*$  be the optimal solution to  $\min_{\mathbf{x} \in \mathbb{R}^d} F_\delta(\mathbf{x})$  and  $\mathbf{x}_*$  denote an optimal solution to  $\min_{\mathbf{x} \in \mathbb{R}^d} F(\mathbf{x})$ . Thanks to the strong convexity of  $F_\delta(\mathbf{x})$ , we have  $F_\delta(\mathbf{x}_*) - F_\delta(\mathbf{x}_\delta^*) \geq \frac{\delta}{2} \|\mathbf{x}_* - \mathbf{x}_\delta^*\|_2^2$ . Then

$$F(\mathbf{x}_*) - F(\mathbf{x}_\delta^*) + \delta/2 \|\mathbf{x}_* - \mathbf{x}_0\|_2^2 - \delta/2 \|\mathbf{x}_\delta^* - \mathbf{x}_0\|_2^2 \geq \delta/2 \|\mathbf{x}_* - \mathbf{x}_\delta^*\|_2^2.$$

Since  $F(\mathbf{x}_*) - F(\mathbf{x}_\delta^*) \leq 0$ , it implies  $\|\mathbf{x}_\delta^* - \mathbf{x}_0\|_2 \leq \|\mathbf{x}_* - \mathbf{x}_0\|_2$ . By Corollary 2, we have

$$\frac{\eta}{2} \|G_\eta^\delta(\mathbf{x}_{t+1})\|_2^2 \leq F_\delta(\mathbf{x}_{t+1}) - F_\delta(\mathbf{x}_\delta^*) \leq \frac{L}{2} \|\mathbf{x}_0 - \mathbf{x}_\delta^*\|_2^2 \left[1 + \sqrt{\delta/(2L)}\right]^{-2t},$$

where  $\eta \leq 1/(L + \delta)$  and  $G_\eta^\delta$  is a proximal gradient of  $F_\delta(\mathbf{x})$  defined as  $G_\eta^\delta(\mathbf{x}) = \frac{1}{\eta} (\mathbf{x} - \mathbf{x}_\eta^+(\delta))$  and

$$\mathbf{x}_\eta^+(\delta) = \arg \min_{\mathbf{y}} \left\{ \eta (\nabla f(\mathbf{x}) + \delta(\mathbf{x} - \mathbf{x}_0))^\top (\mathbf{y} - \mathbf{x}) + \eta g(\mathbf{y}) + \frac{1}{2} \|\mathbf{y} - \mathbf{x}\|_2^2 \right\}.$$

Recall that  $\mathbf{x}_\eta^+ = P_{\eta g}(\mathbf{x} - \eta \nabla f(\mathbf{x}))$ . It is not difficult to derive that  $\|\mathbf{x}_\eta^+ - \mathbf{x}_\eta^+(\delta)\|_2 \leq 2\eta\delta \|\mathbf{x} - \mathbf{x}_0\|_2$  (by Lemma 4). Since  $G_\eta(\mathbf{x}) = \frac{1}{\eta} (\mathbf{x} - \mathbf{x}_\eta^+)$ , we have

$$\|G_\eta(\mathbf{x})\|_2 \leq \|G_\eta^\delta(\mathbf{x})\|_2 + \|\mathbf{x}_\eta^+ - \mathbf{x}_\eta^+(\delta)\|_2/\eta \leq \|G_\eta^\delta(\mathbf{x})\|_2 + 2\delta \|\mathbf{x} - \mathbf{x}_0\|_2.$$

Let  $\eta = 1/(L + \delta)$ , we have

$$\begin{aligned} \|G_\eta(\mathbf{x}_{t+1})\|_2 &\leq 2\delta \|\mathbf{x}_{t+1} - \mathbf{x}_0\|_2 + \sqrt{L/\eta} \|\mathbf{x}_0 - \mathbf{x}_\delta^*\|_2 \left[1 + \sqrt{\delta/(2L)}\right]^{-t} \\ &\leq 2\sqrt{2}\delta \|\mathbf{x}_* - \mathbf{x}_0\|_2 + \sqrt{L(L + \delta)} \|\mathbf{x}_0 - \mathbf{x}_\delta^*\|_2 \left[1 + \sqrt{\delta/(2L)}\right]^{-t}. \end{aligned}$$

where we use the inequality  $\|\mathbf{x}_\delta^* - \mathbf{x}_0\|_2 \leq \|\mathbf{x}_* - \mathbf{x}_0\|_2$ . Since  $\|G_\eta(\mathbf{x})\|_2$  is a monotonically decreasing function of  $\eta$  [7], then  $\|G(\mathbf{x})\|_2 \leq \|G_\eta(\mathbf{x})\|_2$  for  $\eta = 1/(L + \delta) \leq 1/L$ . Then

$$\|G(\mathbf{x}_{t+1})\|_2 \leq \sqrt{L(L + \delta)} \|\mathbf{x}_0 - \mathbf{x}_\delta^*\|_2 \left[1 + \sqrt{\delta/(2L)}\right]^{-t} + 2\sqrt{2}\delta \|\mathbf{x}_0 - \mathbf{x}_*\|_2.$$

□

## F Proof of Theorem 6

*Proof.* • We first prove the case when  $\theta \in (0, 1/2]$ . We can easily induce that  $F(\mathbf{x}_k) - F_* \leq \epsilon_0$  from Lemma 3. Let  $t_k = \lceil \sqrt{\frac{2L}{\delta_k}} \log \frac{\sqrt{L(L+\delta_k)}}{\delta_k} \rceil$ . Applying Theorem 5 to the  $k$ -the stage of adaAGC and using Lemma 1, we have

$$\begin{aligned} \|G(\mathbf{x}_{t_k+1}^k)\|_2 &\leq (\sqrt{L(L+\delta_k)}) \left[ 1 + \sqrt{\frac{\delta_k}{2L}} \right]^{-t_k} + 2\sqrt{2}\delta_k \\ &\times \left( \frac{2}{L} \|G(\mathbf{x}_{k-1})\|_2 + c^{\frac{1}{(1-\theta)}} 2^{\frac{\theta}{(1-\theta)}} \|G(\mathbf{x}_{k-1})\|_2^{\frac{\theta}{(1-\theta)}} \right), \end{aligned} \quad (18)$$

Note that at each stage, we check two conditions (i)  $\|G(\mathbf{x}_{\tau+1}^k)\|_2 \leq \epsilon_{k-1}/2$  and (ii)  $\tau = t_k$ . If the first condition satisfies first, we proceed to the next stage ( $k$  increases by 1). If the second condition satisfies first, then we can claim that  $c_e \leq c$  and then we increase  $c_e$  by a factor  $\gamma > 1$  and then restart the same stage. To verify the claim, assume  $c_e > c$  and the second condition satisfies first, i.e.,  $\tau = t_k$  but  $\|G(\mathbf{x}_{\tau+1}^k)\|_2 > \epsilon_{k-1}/2$ . We will deduce a contradiction. To this end, we use (18) and note the value of  $t_k$ , we have

$$\begin{aligned} \|G(\mathbf{x}_{t_k+1}^k)\|_2 &\leq (\delta_k + 2\sqrt{2}\delta_k) \times \left( \frac{2}{L} \|G(\mathbf{x}_{k-1})\|_2 + c^{\frac{1}{(1-\theta)}} 2^{\frac{\theta}{(1-\theta)}} \|G(\mathbf{x}_{k-1})\|_2^{\frac{\theta}{(1-\theta)}} \right) \\ &\leq 4\delta_k \left( \frac{2}{L} \|G(\mathbf{x}_{k-1})\|_2 + c^{\frac{1}{(1-\theta)}} 2^{\frac{\theta}{(1-\theta)}} \|G(\mathbf{x}_{k-1})\|_2^{\frac{\theta}{(1-\theta)}} \right) \\ &\leq \frac{\epsilon_{k-1}}{4} + \frac{c^{\frac{1}{(1-\theta)}} 2^{\frac{\theta}{(1-\theta)}} \epsilon_{k-1}}{4c_e^{\frac{1}{(1-\theta)}} 2^{\frac{\theta}{(1-\theta)}}} \leq \epsilon_{k-1}/2 = \epsilon_k, \end{aligned}$$

where the last inequality follows that  $c_e > c$ . This contradicts to the assumption that  $\|G(\mathbf{x}_{\tau+1}^k)\|_2 > \epsilon_{k-1}/2$ , which verifies our claim.

Since  $c_e$  is increased by a factor  $\gamma > 1$  whenever condition (ii) holds first, so within at most  $\lceil \log_\gamma(c/c_0) \rceil$  times condition (ii) holds first. Similarly with at most  $\lceil \log_2 \epsilon_0/\epsilon \rceil$  times that condition (i) holds first before the algorithm terminates. We let  $T_k$  denote the total number of iterations in order to make condition (i) satisfies in stage  $k$ . First, we can see that  $c_e \leq \gamma c$ . Let  $\delta'_k = \min(\frac{L}{32}, \frac{\epsilon_{k-1}^p}{16(\gamma c 2^\theta)^{1/(1-\theta)}}) \leq \delta_k$  and  $t'_k = \lceil \sqrt{\frac{2L}{\delta'_k}} \log \frac{\sqrt{L(L+\delta'_k)}}{\delta'_k} \rceil$ . Let  $s_k$  denote the number of cycles in each stage in order to have  $\|G(\mathbf{x}_{\tau+1}^k)\|_2 \leq \epsilon_k$ . Then  $s_k \leq \log_\gamma(c/c_0) + 1$ . The total number of iterations of across all stages is bounded by  $\sum_{k=1}^K s_k t_k$ , which is bounded by

$$\sum_{k=1}^K s_k t_k \leq (1 + \log_\gamma(c/c_0)) \sum_{k=1}^K t'_k.$$

Plugging the value of  $t'_k$ , we can deduce the iteration complexity in Theorem 6 for  $\theta \in (0, 1/2]$ .

- Now we consider the proof when  $\theta \in (1/2, 1]$ . Similar to the proof for  $\theta \in (0, 1/2]$ , we can easily induce that  $F(\mathbf{x}_k) - F_* \leq \epsilon_0$  from Lemma 3. Let  $t_k = \lceil \sqrt{\frac{2L}{\delta_k}} \log \frac{\sqrt{L(L+\delta_k)}}{\delta_k} \rceil$ . Applying Theorem 5 to the  $k$ -the stage of adaAGC and using Lemma 1, we have

$$\|G(\mathbf{x}_{t_k+1}^k)\|_2 \leq (\sqrt{L(L+\delta_k)}) \left[ 1 + \sqrt{\frac{\delta_k}{2L}} \right]^{-t_k} + 2\sqrt{2}\delta_k \times \left( \frac{2}{L} + 2c^2 \xi^{2\theta-1} \right) \|G(\mathbf{x}_{k-1})\|_2. \quad (19)$$

Note that at each stage, we check two conditions (i)  $\|G(\mathbf{x}_{\tau+1}^k)\|_2 \leq \epsilon_{k-1}/2$  and (ii)  $\tau = t_k$ . If the first condition satisfies first, we proceed to the next stage ( $k$  increases by 1). If the second condition satisfies first, then we can claim that  $c_e \leq c$  and then we increase  $c_e$  by a factor  $\gamma > 1$  and then restart the same stage. To verify the claim, assume  $c_e > c$  and the second condition satisfies first, i.e.,  $\tau = t_k$  but  $\|G(\mathbf{x}_{\tau+1}^k)\|_2 > \epsilon_{k-1}/2$ . We will deduce a contradiction. To this end, we use (19) and note the value of  $t_k$ , we have

$$\|G(\mathbf{x}_{t_k+1}^k)\|_2 \leq 4\delta_k \left( \frac{2}{L} + 2c^2 \xi^{2\theta-1} \right) \|G(\mathbf{x}_{k-1})\|_2 \leq \frac{\epsilon_{k-1}}{4} + \frac{8c^2 \xi^{2\theta-1}}{32c_e^2 \epsilon_0^{2\theta-1}} \epsilon_{k-1} \leq \frac{\epsilon_{k-1}}{2} = \epsilon_k,$$

where the last inequality follows that  $c_e > c$  and  $\xi \leq \epsilon_0$ . This contradicts to the assumption that  $\|G(\mathbf{x}_{\tau+1}^k)\|_2 > \epsilon_{k-1}/2$ , which verifies our claim.

Since  $c_e$  is increased by a factor  $\gamma > 1$  whenever condition (ii) holds first, so within at most  $\lceil \log_\gamma(c/c_0) \rceil$  times condition (ii) holds first. Similarly with at most  $\lceil \log_2 \epsilon_0/\epsilon \rceil$  times that condition (i) holds first before the algorithm terminates. We let  $T_k$  denote the total number of iterations in order to make condition (i) satisfies in stage  $k$ . First, we can see that  $c_e \leq \gamma c$ . Let  $\delta'_k = \min(\frac{L}{32}, \frac{1}{32(\gamma c)^2 \epsilon_0^{2\theta-1}}) \leq \delta_k$  and  $t'_k = \lceil \sqrt{\frac{2L}{\delta'_k}} \log \frac{\sqrt{L(L+\delta'_k)}}{\delta'_k} \rceil$ . Let  $s_k$  denote the number of cycles in each stage in order to have  $\|G(\mathbf{x}_{\tau+1}^k)\|_2 \leq \epsilon_k$ . Then  $s_k \leq \log_\gamma(c/c_0) + 1$ . The total number of iterations of across all stages is bounded by  $\sum_{k=1}^K s_k t_k$ , which is bounded by

$$\sum_{k=1}^K s_k t_k \leq (1 + \log_\gamma(c/c_0)) \sum_{k=1}^K t'_k.$$

Plugging the value of  $t'_k$ , we can deduce the iteration complexity in Theorem 6 for  $\theta \in (1/2, 1]$ . □

## G Proof of Theorem 8

First, it is easy to see that in either case, the HEB condition of  $F(\cdot)$  with  $\theta = 1/2$  and  $\mu = \sqrt{2/\mu}$  holds. Next, we prove the following lemma.

**Lemma 5.** *Suppose either  $f(\mathbf{x})$  or  $g(\mathbf{x})$  satisfies the following property: for any  $\mathbf{x} \in \text{dom}(F)$ , there exists  $\mu > 0$  such that*

$$h(\mathbf{x}_*) \geq h(\mathbf{x}) + \partial h(\mathbf{x})^\top (\mathbf{x}_* - \mathbf{x}) + \frac{\mu}{2} \|\mathbf{x} - \mathbf{x}_*\|_2^2, \quad (20)$$

where  $\mathbf{x}_*$  is the closest optimal solution to  $\mathbf{x}$ . Then we have the following:

$$F(\mathbf{x}_+) - F(\mathbf{x}_*) \leq O(1/\mu) \|G(\mathbf{x})\|_2^2$$

where

$$\begin{aligned} \mathbf{x}_+ &= \arg \min_{\mathbf{u} \in \mathbb{R}^d} \left[ f(\mathbf{x}) + \langle \nabla f(\mathbf{x}), \mathbf{u} - \mathbf{x} \rangle + \frac{L}{2} \|\mathbf{u} - \mathbf{x}\|_2^2 + g(\mathbf{u}) \right], \\ G(\mathbf{x}) &= L(\mathbf{x} - \mathbf{x}_+), \end{aligned}$$

*Proof.* Define  $\phi(\mathbf{u}) = f(\mathbf{x}) + \langle \nabla f(\mathbf{x}), \mathbf{u} - \mathbf{x} \rangle + \frac{L}{2} \|\mathbf{u} - \mathbf{x}\|_2^2 + g(\mathbf{u})$  and then  $\partial \phi(\mathbf{u}) = \nabla f(\mathbf{x}) + L(\mathbf{u} - \mathbf{x}) + \partial g(\mathbf{u})$ . By the first-order optimality condition of  $\mathbf{x}_+$ , for all  $\mathbf{u} \in \text{dom}(F)$  there exists  $\mathbf{v}_+ \in \partial g(\mathbf{x}_+)$ :

$$\langle \nabla f(\mathbf{x}) + \mathbf{v}_+ - G(\mathbf{x}), \mathbf{u} - \mathbf{x}_+ \rangle \geq 0,$$

Without loss of generality, we first assume  $f(\cdot)$  and  $g(\cdot)$  both satisfy (20) with  $\mu_f \geq 0$  and  $\mu_g \geq 0$ . When  $\mu_f = 0$  or  $\mu_g = 0$ , the inequality is automatically satisfied. Then we have

$$\begin{aligned} f(\mathbf{x}_*) - \frac{\mu_f}{2} \|\mathbf{x}_* - \mathbf{x}\|_2^2 &\geq f(\mathbf{x}) + \langle \nabla f(\mathbf{x}), \mathbf{x}_* - \mathbf{x} \rangle \\ &= f(\mathbf{x}) + \langle \nabla f(\mathbf{x}), \mathbf{x}_+ - \mathbf{x} \rangle + \langle \nabla f(\mathbf{x}), \mathbf{x}_* - \mathbf{x}_+ \rangle \\ &\geq f(\mathbf{x}) + \langle \nabla f(\mathbf{x}), \mathbf{x}_+ - \mathbf{x} \rangle + \langle G(\mathbf{x}), \mathbf{x}_* - \mathbf{x}_+ \rangle + \langle \mathbf{v}_+, \mathbf{x}_+ - \mathbf{x}_* \rangle \\ &\geq f(\mathbf{x}) + \langle \nabla f(\mathbf{x}), \mathbf{x}_+ - \mathbf{x} \rangle + \langle G(\mathbf{x}), \mathbf{x}_* - \mathbf{x}_+ \rangle + g(\mathbf{x}_+) - g(\mathbf{x}_*) + \frac{\mu_g}{2} \|\mathbf{x}_+ - \mathbf{x}_*\|_2^2 \\ &= \phi(\mathbf{x}_+) - \frac{L}{2} \|\mathbf{x} - \mathbf{x}_+\|_2^2 + \langle G(\mathbf{x}), \mathbf{x}_* - \mathbf{x}_+ \rangle + \frac{\mu_g}{2} \|\mathbf{x}_+ - \mathbf{x}_*\|_2^2 - g(\mathbf{x}_*) \\ &= \phi(\mathbf{x}_+) - \frac{1}{2L} \|G(\mathbf{x})\|_2^2 + \langle G(\mathbf{x}), \mathbf{x}_* - \mathbf{x}_+ \rangle + \frac{\mu_g}{2} \|\mathbf{x}_+ - \mathbf{x}_*\|_2^2 - g(\mathbf{x}_*), \end{aligned}$$

where the second inequality uses the optimality condition of  $\mathbf{x}_+$  and the third inequality uses the condition (20) of  $g(\cdot)$ . Next, we consider two cases.



Case I:  $\mu_g > 0$  and  $\mu_f \geq 0$  (i.e.,  $g(\cdot)$  satisfies (20)). We have

$$f(\mathbf{x}_*) \geq \phi(\mathbf{x}_+) - \frac{1}{2L} \|G(\mathbf{x})\|_2^2 - \frac{1}{2\mu_g} \|G(\mathbf{x})\|_2^2 - \frac{\mu_g}{2} \|\mathbf{x}_* - \mathbf{x}_+\|_2^2 + \frac{\mu_g}{2} \|\mathbf{x}_+ - \mathbf{x}_*\|_2^2 - g(\mathbf{x}_*)$$

As a result,

$$F(\mathbf{x}_*) \geq \phi(\mathbf{x}_+) - \frac{1}{2L} \|G(\mathbf{x})\|_2^2 - \frac{1}{2\mu_g} \|G(\mathbf{x})\|_2^2 \geq F(\mathbf{x}_+) - \frac{1}{2L} \|G(\mathbf{x})\|_2^2 - \frac{1}{2\mu_g} \|G(\mathbf{x})\|_2^2$$

Thus

$$F(\mathbf{x}_+) - F(\mathbf{x}_*) \leq \frac{L + \mu_g}{2L\mu_g} \|G(\mathbf{x})\|_2^2$$

Case II:  $\mu_f > 0$  and  $\mu_g \geq 0$  (i.e.,  $f(\cdot)$  satisfies (20)). Then we have

$$\begin{aligned} f(\mathbf{x}_*) &\geq \phi(\mathbf{x}_+) - \frac{1}{2L} \|G(\mathbf{x})\|_2^2 + \langle G(\mathbf{x}), \mathbf{x}_* - \mathbf{x}_+ \rangle + \frac{\mu_f}{2} \|\mathbf{x}_* - \mathbf{x}\|_2^2 - g(\mathbf{x}_*) \\ &\geq \phi(\mathbf{x}_+) - \frac{1}{2L} \|G(\mathbf{x})\|_2^2 + \langle G(\mathbf{x}), \mathbf{x}_* - \mathbf{x} \rangle + \langle G(\mathbf{x}), \mathbf{x} - \mathbf{x}_+ \rangle + \frac{\mu_f}{2} \|\mathbf{x}_* - \mathbf{x}\|_2^2 - g(\mathbf{x}_*) \\ &\geq \phi(\mathbf{x}_+) + \frac{1}{2L} \|G(\mathbf{x})\|_2^2 + \langle G(\mathbf{x}), \mathbf{x}_* - \mathbf{x} \rangle + \frac{\mu_f}{2} \|\mathbf{x}_* - \mathbf{x}\|_2^2 - g(\mathbf{x}_*) \\ &\geq \phi(\mathbf{x}_+) + \frac{1}{2L} \|G(\mathbf{x})\|_2^2 - \frac{1}{2\mu_f} \|G(\mathbf{x})\|_2^2 - \frac{\mu_f}{2} \|\mathbf{x}_* - \mathbf{x}\|_2^2 + \frac{\mu_f}{2} \|\mathbf{x}_* - \mathbf{x}\|_2^2 - g(\mathbf{x}_*) \\ &\geq F(\mathbf{x}_+) - \frac{1}{2\mu_f} \|G(\mathbf{x})\|_2^2 - g(\mathbf{x}_*) \end{aligned}$$

Thus,

$$F(\mathbf{x}_+) - F(\mathbf{x}_*) \leq \frac{1}{2\mu_f} \|G(\mathbf{x})\|_2^2$$

In either case, we have  $F(\mathbf{x}_+) - F(\mathbf{x}_*) \leq O(1/\mu) \|G(\mathbf{x})\|_2^2$ .  $\square$

Finally, we see that in order to guarantee  $F(\mathbf{x}_+) - F(\mathbf{x}_*) \leq \epsilon$ , we need to have  $\|G(\mathbf{x})\|_2 \leq O(\sqrt{\mu\epsilon})$ .

## References

- [1] A. Beck and M. Teboulle. A fast iterative shrinkage-thresholding algorithm for linear inverse problems. *SIAM J. Img. Sci.*, 2:183–202, 2009.
- [2] E. Bierstone and P. D. Milman. Semianalytic and subanalytic sets. *Publications Mathématiques de l’Institut des Hautes Études Scientifiques*, 67(1):5–42, 1988.
- [3] J. Bolte, T. P. Nguyen, J. Peypouquet, and B. Suter. From error bounds to the complexity of first-order descent methods for convex functions. *CoRR*, abs/1510.08234, 2015.
- [4] D. Drusvyatskiy and A. S. Lewis. Error bounds, quadratic growth, and linear convergence of proximal methods. *arXiv:1602.06661*, 2016.
- [5] Q. Lin and L. Xiao. An adaptive accelerated proximal gradient method and its homotopy continuation for sparse optimization. In *Proceedings of the International Conference on Machine Learning, (ICML)*, pages 73–81, 2014.
- [6] Y. Nesterov. *Introductory lectures on convex optimization : a basic course*. Applied optimization. Kluwer Academic Publ., 2004.
- [7] Y. Nesterov. Gradient methods for minimizing composite objective function. Core discussion papers, Université catholique de Louvain, Center for Operations Research and Econometrics (CORE), 2007.
- [8] P. Tseng. On accelerated proximal gradient methods for convex-concave optimization. *submitted to SIAM Journal on Optimization*, 2008.
